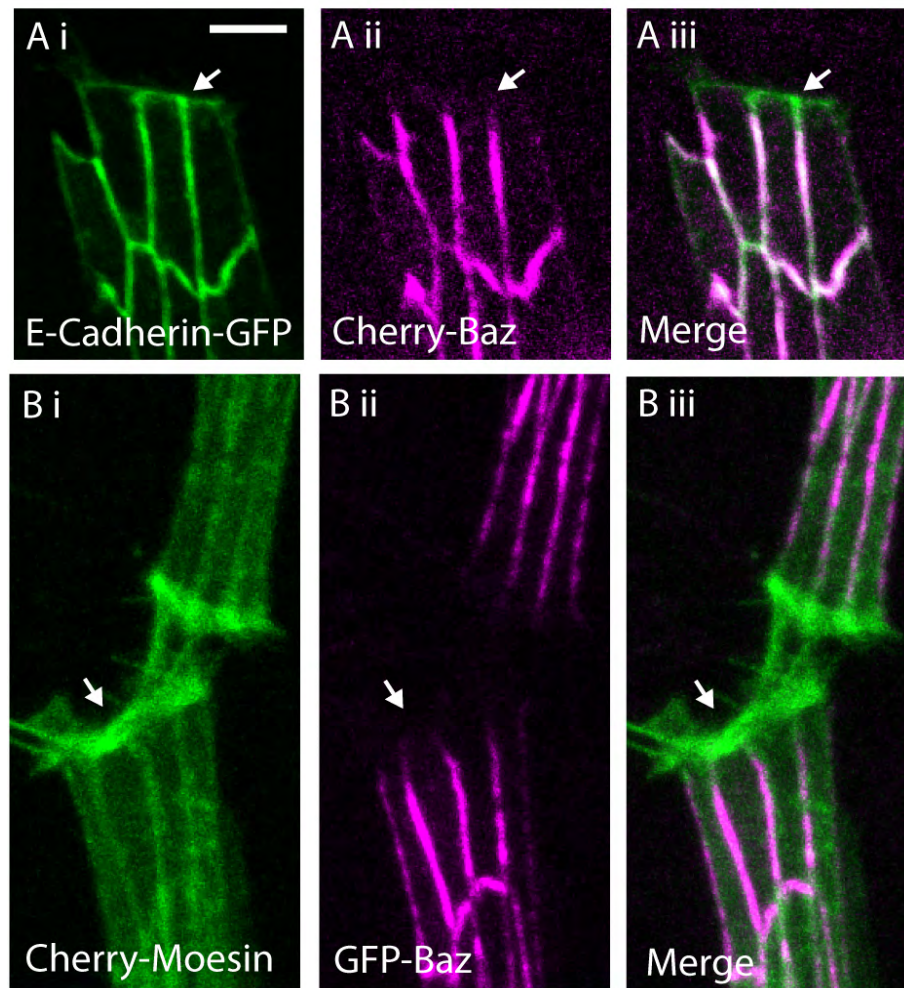

**Fig. S1. Baz is absent from the leading edge in live embryos.** (A) UAS-E-cadherin-GFP (green) and UAS-mCherry-Baz (magenta) expressed using *en*-Gal4 reveals absence of Baz from leading edge cell-cell junctions (arrows). (B) UAS-mCherry-Moesin (green) and UAS-GFP-Baz (magenta) expressed using *en*-Gal4 reveals absence of Baz from actin-rich region of the leading edge (arrows). Scale bar: 5  $\mu$ m.

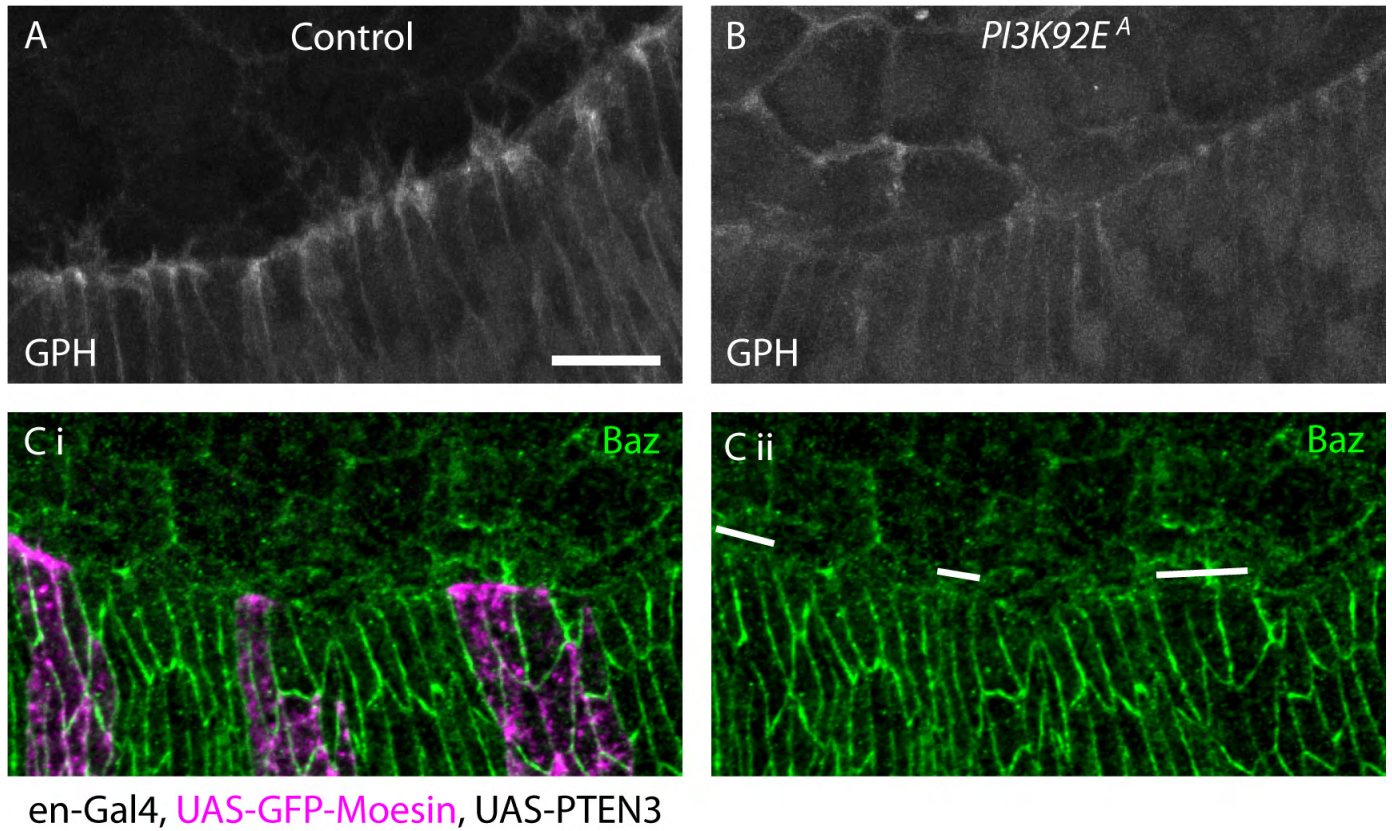

**Fig. S2. PIP3 distribution in zygotic *PI3K92E* mutant embryo and Baz distribution in Pten3-expressing embryo.** (A,B) GPH expressed ubiquitously in wild-type (A) or *PI3K92E<sup>A</sup>* zygotic mutant (B) embryos reveals that leading edge PIP3 is severely depleted in the absence of zygotic PI3K expression. (C) Staining of endogenous Baz (green) in an embryo expressing UAS-Pten3 in stripes using *en*-Gal4 reveals that cellular distribution of Baz is unaffected by depletion of PIP3. UAS-GFP-Moesin (magenta) is also expressed under control of *en*-Gal4 to allow Pten3-expressing cells to be identified. Magenta channel has been removed from Cii and Pten3-expressing cells are instead indicated by white bars. Scale bar: 10  $\mu$ m.

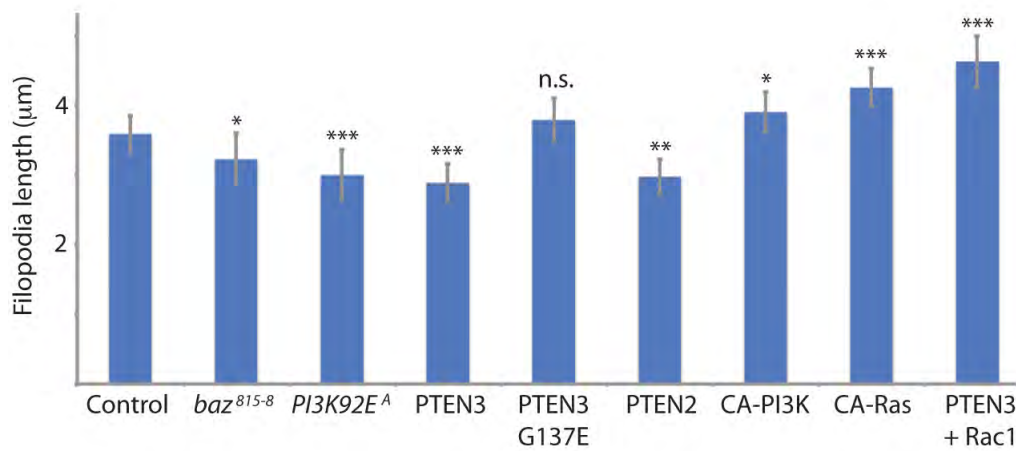

**Fig. S3. Effect of altering PIP3 on filopodia length.** Length of leading edge filopodia measured in embryos expressing UAS-GFP-Moesin using *en*-Gal4 alongside the indicated transgenes or in indicated mutant.  $n \geq 47$  stripes from at least 11 embryos for each genotype. \*\*\* $P < 0.001$ , filopodia length significantly different from control. \*\* $P < 0.01$ , \* $P < 0.05$ , n.s. indicates  $P > 0.05$ . Error bars indicate s.e.m.

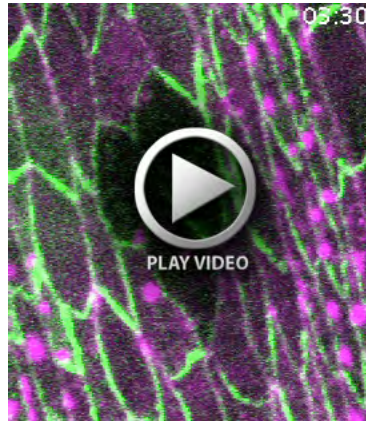

**Movie 1. Dynamics of actin and Baz during epithelial wound healing.** Live imaging of laser wound healing in an embryo expressing GFP-Baz (green) and mCherry-Moesin (magenta) reveals that accumulation of actin at the wound edge coincides with the loss of Baz. Images are recorded at 90-second intervals. Stills are shown in Fig. 1C.

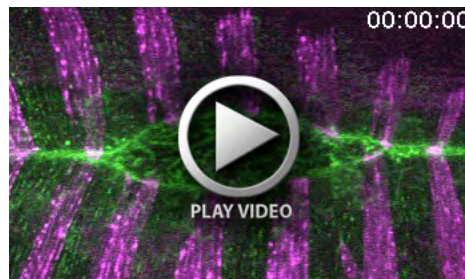

**Movie 2. Zippering during DC occurs at a consistent rate in a control embryo.** Live imaging of the last stage of DC in an embryo expressing GFP-Moesin ubiquitously (green) and UAS-mCherry-Moesin (magenta) using *en*-Gal4 shows that zippering proceeds at a similar rate in *en*-Gal4-expressing stripes and in the intervening non-*en*-Gal4 stripes. Images are recorded at 120-second intervals. Stills are shown in Fig. 5D.



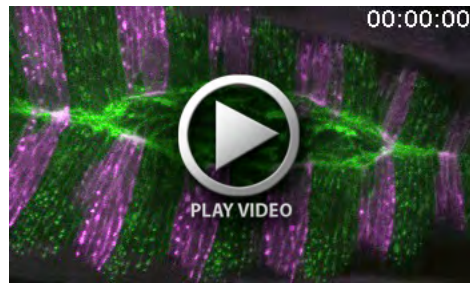

**Movie 3. Zippering speed is reduced in cells overexpressing PTEN3.** Live imaging of the last stage of DC in an embryo expressing GFP-Moesin ubiquitously (green) with UAS-mCherry-Moesin (magenta) and UAS-Pten3 expressed using *en-Gal4*. Zippering is slower in the *en-Gal4* stripes expressing Pten3, such that stripes are skipped by the zippering canthus. Images are recorded at 120-second intervals. Stills are shown in Fig. 5E.

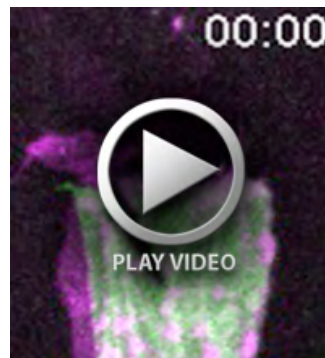

**Movie 4. Filopodia form at locations on the leading edge at which PIP3 levels are elevated.** Live imaging of DC in an embryo expressing UAS-GPH (green) and UAS-mCherry-Moesin (magenta) using *en-Gal4* reveals spatial and temporal correlation between accumulation of PIP3 at the leading edge and initiation of filopodia. Images are recorded at 15-second intervals. Stills are shown in Fig. 6C.

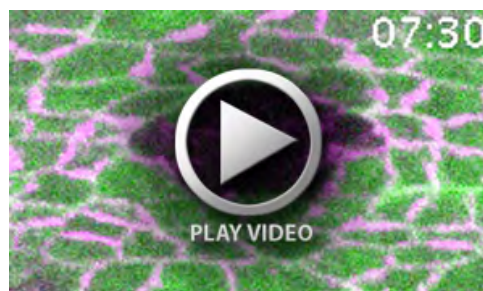

**Movie 5. PIP3 accumulates at cell-cell junctions along epithelial wound edges.** Live imaging of laser wound healing in embryo expressing GPH (green) and mCherry-Baz (magenta) in the epidermis reveals that PIP3 accumulates at wound edge cell-cell junctions. Junctions at which PIP3 accumulates are devoid of Baz. Images are recorded at 150-second intervals. Stills shown in Fig. 7A.
